# Supplementary material
Source: PubMed Central journal article supplement (PMC4351658)
Supplement: NIHMS406629-supplement-suple_text.pdf [file NIHMS406629-supplement-suple_text.pdf]

## **Supplementary Figure Legends.**

### **Supplemental Figure 1. N-cadherin expression modestly reduces Akt3 mRNA levels**

**but has no effect on Akt3 protein stability.** A and B, Akt3 mRNA levels were analyzed in PyMT, PyMT-N-cad, PyMT-control vector, and PyMT-N-cad-Myc cells by real time-PCR and normalized to GAPDH mRNA levels. The bar graphs show average fold change  $\pm$  SEM from three independent experiments performed in triplicates. C and D. PyMT, PyMT-N-cad, PyMT-control vector, and PyMT-N-cad-Myc cells were treated with 100 $\mu$ g/ml cycloheximide (CHX) for the indicated times. Lysates from these cells were western blotted with Akt3 and actin antibodies. The levels of Akt3 were quantified by densitometry and normalized to actin. The line graphs show average densitometry value  $\pm$  SEM from three and two independent experiments for (C) and (D), respectively. Data is represented relative to time 0. Note: Blots for PyMT, PyMT-N-cad, PyMT-control vector, and PyMT-N-cad-Myc cells were independently run.

### **Supplemental Figure 2. FGFR inhibition does not restore Akt3 expression in**

**PyMT-N-cad cells.** PyMT-N-cad cells were treated in growth media with the FGFR1 inhibitor PD173074 at 0.1-0.5  $\mu$ M for 18hrs. Cells were lysed and immunoblotted for Akt3, p-FRS2, p-ERK, ERK and Actin.
